# Supplementary material for: Probing electron transfer between hemin and riboflavin using a combination of analytical approaches and theoretical calculations
Source: Royal Society of Chemistry journal article supplement (doi:10.1039/c7cp06492f), 2017-01-01
Supplement: c7cp06492f1.pdf [file c7cp06492f1.pdf]

*Electronic Supplementary Information for*

**Probing Electron Transfer Between Hemin and Riboflavin Using A Combination  
of Analytical Approaches and Theoretical Calculations**

Wen-Lan Wang\*, Yuan Min\*, Sheng-Song Yu, Wei Chen, Jie-Jie Chen\*\*, Xiao-Yang  
Liu, Han-Qing Yu\*\*

Department of Chemistry, University of Science & Technology of China, Hefei,  
230026, China

\*These authors contributed equally to this work.

**\*\*Corresponding authors:**

Dr. Jie-Jie Chen, Fax: +86 551 63601592; E-mail: [chenjiej@mail.ustc.edu.cn](mailto:chenjiej@mail.ustc.edu.cn);

Prof. Han-Qing Yu, Fax: +86 551 63607592; E-mail: [hqyu@ustc.edu.cn](mailto:hqyu@ustc.edu.cn)

**Table S1.** Gibbs Free Energy Change ( $\Delta G^0$ ), Activation Energy ( $E_a$ ), Entropy of Activation ( $\Delta^\ddagger S^0$ ), and Rate Constant ( $k_{ET}$ ) for the Hemin(III) to Hemx(II) Reduction with or without RF<sub>ox</sub> Cofactor in Aqueous Solution at Room Temperature (298.15 K) and Atmospheric pressure.

| Reaction                                                                                                                                              | $\Delta G^0$ | $E_a$      | $\Delta^\ddagger S^0$ | $k_{ET}$                 |
|-------------------------------------------------------------------------------------------------------------------------------------------------------|--------------|------------|-----------------------|--------------------------|
|                                                                                                                                                       | (kcal/mol)   | (kcal/mol) | (cal/mol·K)           | (s <sup>-1</sup> )       |
| Hemin(III) + H <sub>3</sub> O <sup>+</sup> + OH <sup>-</sup> + e <sup>-</sup><br>⇌ Hemx(II) + 2H <sub>2</sub> O                                       | -127.690     | 0.011      | -12.247               | 1.284 × 10 <sup>10</sup> |
| Hemin(III) - RF <sub>ox</sub> + H <sub>3</sub> O <sup>+</sup> + OH <sup>-</sup><br>+ e <sup>-</sup> ⇌ Hemx(II) - RF <sub>ox</sub> + 2H <sub>2</sub> O | -190.819     | 1.030      | 8.558                 | 4.602 × 10 <sup>14</sup> |

**Table S2.** Standard Gibb's Free Energy Change ( $\Delta G^0$ ) and Enthalpy Change ( $\Delta H^0$ ) of the Reactions Involved in the Electron and Proton Transfer Reaction of Porphyrin Iron and RF in Aqueous Solution at Room Temperature and Atmospheric Pressure.

| Reaction                                                                                                                                    | $\Delta G^0$<br>(kcal/mol) | $\Delta H^0$<br>(kcal/mol) |
|---------------------------------------------------------------------------------------------------------------------------------------------|----------------------------|----------------------------|
| $\text{Hemx(II)} \rightleftharpoons \text{Heme(II)}$                                                                                        | 1.067                      | 0.039                      |
| $\text{Hemx(II)} - \text{RF}_{\text{ox}} \rightleftharpoons \text{Heme(II)} - \text{RF}_{\text{ox}}$                                        | -130.414                   | -128.323                   |
| $\text{RF}_{\text{ox}} + \text{Heme(II)} \rightleftharpoons \text{RF}_{\text{rad}}^{\bullet-} + \text{Hemin(III)}$                          | -55.077                    | -56.077                    |
| $\text{RF}_{\text{rad}}^{\bullet-} + \text{H}_3\text{O}^+ \rightleftharpoons \text{RF}_{\text{rad}}\text{H}^{\bullet} + \text{H}_2\text{O}$ | -37.576                    | -38.168                    |
| $\text{RF}_{\text{rad}}^{\bullet-} + \text{Heme(II)} \rightleftharpoons \text{RF}_{\text{red}}^{2-} + \text{Hemin(III)}$                    | -23.323                    | -25.379                    |
| $\text{RF}_{\text{rad}}\text{H}^{\bullet} + \text{Heme(II)} \rightleftharpoons \text{RF}_{\text{red}}\text{H}^- + \text{Hemin(III)}$        | -43.924                    | -45.612                    |
| $\text{RF}_{\text{red}}^{2-} + \text{H}_3\text{O}^+ \rightleftharpoons \text{RF}_{\text{red}}\text{H}^- + \text{H}_2\text{O}$               | -58.177                    | -58.401                    |
| $\text{RF}_{\text{red}}\text{H}^- + \text{H}_3\text{O}^+ \rightleftharpoons \text{RF}_{\text{red}}\text{H}_2 + \text{H}_2\text{O}$          | -22.217                    | -22.338                    |

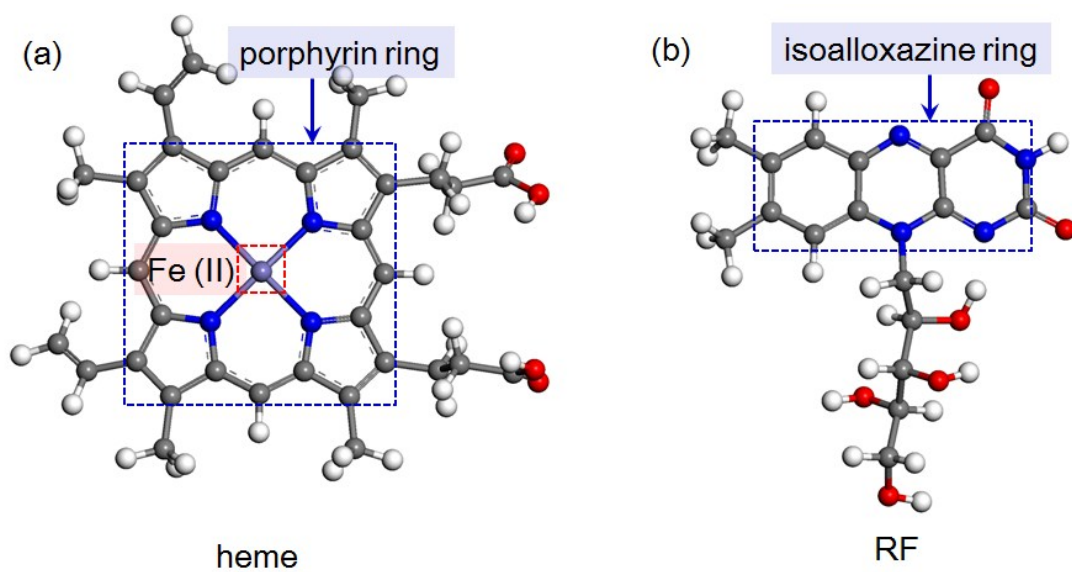

**Figure S1.** Energy-minimized structures of heme(II) and RF<sub>ox</sub>. (a) Heme(II) structure with porphyrin ring and iron (II); and (b) RF<sub>ox</sub> structure with N-heterocycle isoalloxazine ring

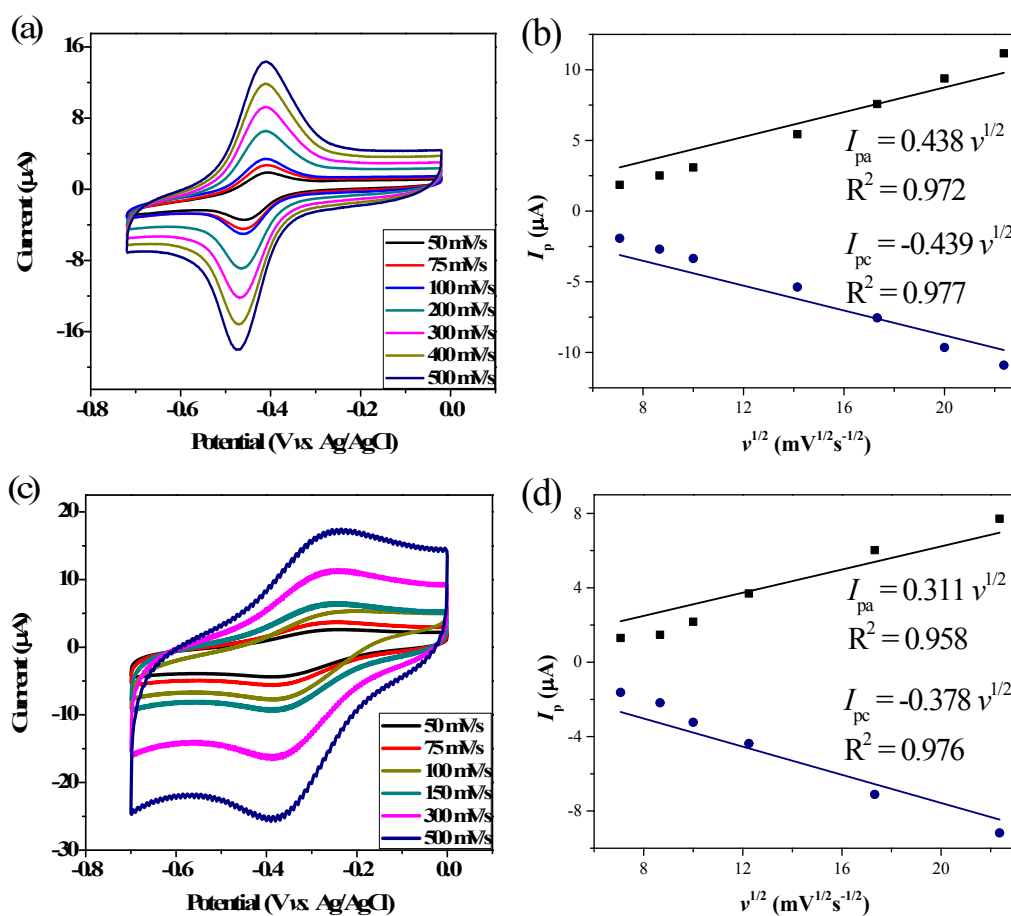

**Figure S2.** (a) CVs of 50  $\mu\text{M}$  RF at a CPE at scan rates from 50 to 500 mV/s in the TL-cell. Scan range: 0 to -0.70 V vs. Ag/AgCl; working electrode: CPE with a surface area of 0.6  $\text{cm}^2$ ; buffer solution: PBS (pH = 7.0); (b) Relationship between RF peak current (the first step of reduction and oxidation) and scan rate; (c) CVs of 50  $\mu\text{M}$  Hemin(III) at a CPE at scan rate from 50 to 500 mV/s in the TL-cell. Scan range: 0 to -0.70 V vs. Ag/AgCl; working electrode: CPE with a surface area of 0.6  $\text{cm}^2$ ; buffer solution: PBS (pH = 7.0); and (d) Relationship between Hemin(III) peak current and scan rate

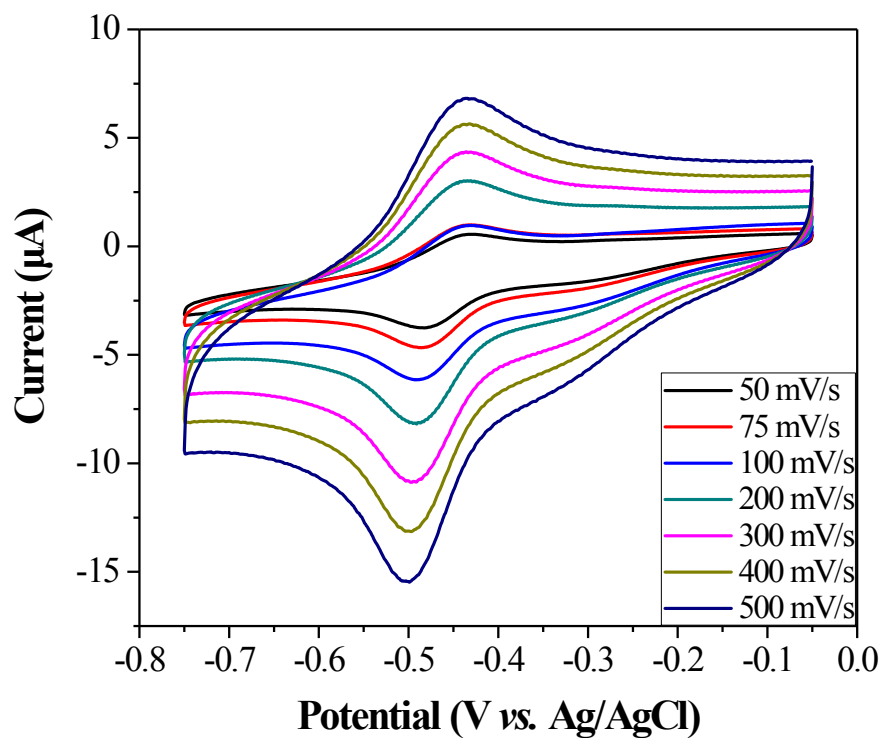

**Figure S3.** CV of 50  $\mu\text{M}$  RF and 50  $\mu\text{M}$  Hemin(III) mixture in the TL-cell at a scan rate from 50 to 500 mV/s. Scan range: -0.05 to -0.75 V vs. Ag/AgCl; buffer solution: PBS (pH = 7.0); working electrode: CPE with a surface area of 0.6  $\text{cm}^2$

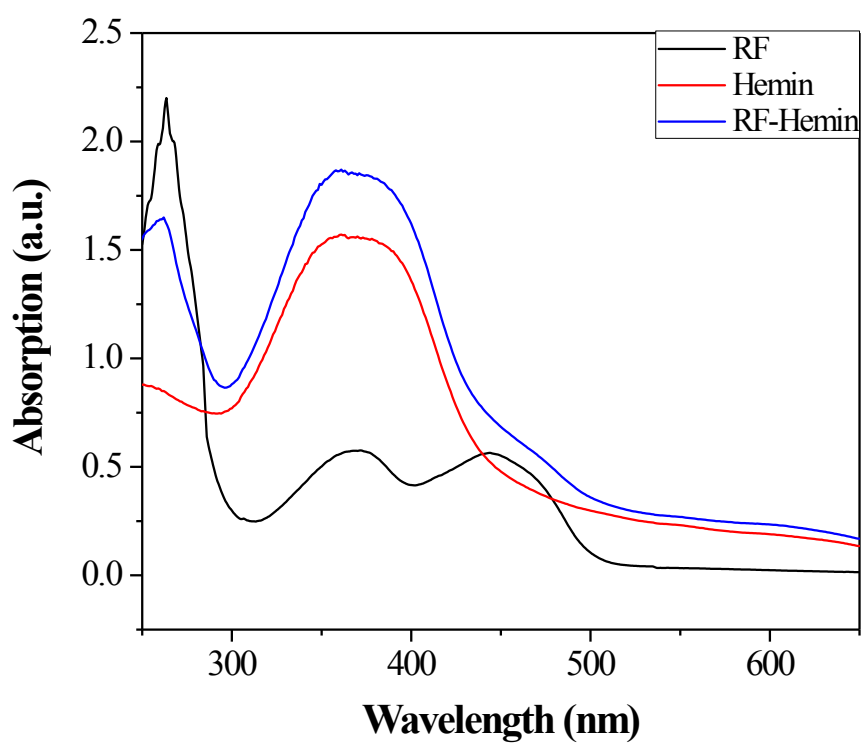

**Figure S4.** UV-Vis spectrum of 50  $\mu\text{M}$  RF, 50 $\mu\text{M}$  hemin(III) and 50  $\mu\text{M}$  RF-hemin(III) mixture in the TL-cell without electron supply. Buffer solution: PBS (pH = 7.0)

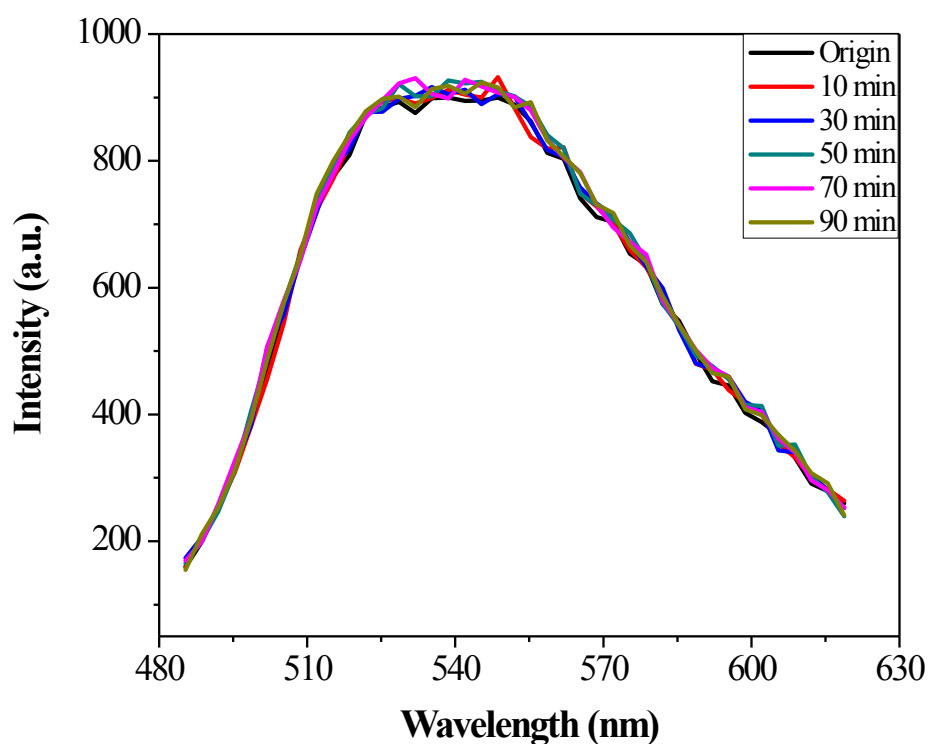

**Figure S5.** *In situ* electrochemical fluorescence spectra of RF at -0.415 V vs. Ag/AgCl for 90 min in the TL-cell. Excitation wavelength was 444 nm; the excitation and emission slits were both 5 nm; scanning speed was set at 600 nm/min, wavelength of 490-620 nm; buffer solution: PBS (pH = 7.0)
